# Supplementary material
Source: PubMed Central journal article supplement (PMC6584283)
Supplement: jamaoncol-4-1228-s001.pdf [file jamaoncol-4-1228-s001.pdf]

## Supplementary Online Content

Carlo MI, Mukherjee S, Mandelker D, et al. Prevalence of Germline Mutations in Cancer Susceptibility Genes in Patients With Advanced Renal Cell Carcinoma. *JAMA Oncol*. Published online July 05, 2018. doi:10.1001/jamaoncol.2018.1986

**eTable 1.** Genes Included in the Somatic and Germline MSK-IMPACT Assay

**eTable 2.** Current Referral Indications for Genetic Counseling Referral for Patients With Renal Cell Carcinoma

**eTable 3.** Reasons for Declining Genetic Testing

**eTable 4.** Demographic Characteristics

**eTable 5.** Detail on Pathogenic Mutations

**eTable 6.** CHEK2 Variants and Association with Renal Cell Carcinoma

**eTable 7.** Associations Between Clinicopathologic Characteristics and Presence of RCC-Associated Germline Mutation

**eTable 8.** OncoKB Levels of Evidence and Somatic Biomarkers in Cohort

**eFigure.** Families of BAP1 Germline Mutant Patients and Tumor Immunohistochemistry

This supplementary material has been provided by the authors to give readers additional information about their work.

**eTable 1: Genes on MSK-IMPACT and syndromes associated with germline mutations**

|               |                                                               |
|---------------|---------------------------------------------------------------|
| ABL1          |                                                               |
| ACVR1         |                                                               |
| AKT1          |                                                               |
| AKT2          |                                                               |
| AKT3          |                                                               |
| <b>ALK</b>    | Familial neuroblastoma                                        |
| ALOX12B       |                                                               |
| AMER1         |                                                               |
| ANKRD11       |                                                               |
| <b>APC</b>    | Familial adenomatous polyposis                                |
| AR            |                                                               |
| ARAF          |                                                               |
| ARID1A        |                                                               |
| ARID1B        |                                                               |
| ARID2         |                                                               |
| ARID5B        |                                                               |
| ASXL1         |                                                               |
| ASXL2         |                                                               |
| <b>ATM</b>    | Ataxia-telangiectasia; ATM-related cancer risk                |
| ATR           |                                                               |
| ATRX          |                                                               |
| AURKA         |                                                               |
| AURKB         |                                                               |
| AXIN1         |                                                               |
| AXIN2         |                                                               |
| AXL           |                                                               |
| B2M           |                                                               |
| BABAM1        |                                                               |
| <b>BAP1</b>   | Mesothelioma, uveal melanoma, RCC                             |
| <b>BARD1</b>  | Hereditary breast and ovarian cancer syndrome                 |
| BBC3          |                                                               |
| BCL10         |                                                               |
| BCL2          |                                                               |
| BCL2L11       |                                                               |
| BCL2L1        |                                                               |
| BCL6          |                                                               |
| BCOR          |                                                               |
| BIRC3         |                                                               |
| <b>BLM</b>    | Bloom syndrome                                                |
| <b>BMPR1A</b> | Juvenile polyposis syndrome                                   |
| BRAF          |                                                               |
| <b>BRCA1</b>  | Hereditary breast and ovarian cancer syndrome                 |
| <b>BRCA2</b>  | Hereditary breast and ovarian cancer syndrome; Fanconi anemia |
| BRD4          |                                                               |
| <b>BRIP1</b>  | BRIP1-related cancer; Fanconi                                 |

|               |                                   |
|---------------|-----------------------------------|
|               | anemia                            |
| BTK           |                                   |
| KNSTRN        |                                   |
| CALR          |                                   |
| CARD11        |                                   |
| CARM1         |                                   |
| CASP8         |                                   |
| CBFB          |                                   |
| CBL           |                                   |
| CCND1         |                                   |
| CCND2         |                                   |
| CCND3         |                                   |
| CCNE1         |                                   |
| CD274         |                                   |
| CD276         |                                   |
| CD79A         |                                   |
| CD79B         |                                   |
| CDC42         |                                   |
| CDC73         |                                   |
| <b>CDH1</b>   | Hereditary diffuse gastric cancer |
| CDK12         |                                   |
| <b>CDK4</b>   | Familial cutaneous melanoma       |
| CDK6          |                                   |
| CDK8          |                                   |
| CDKN1A        |                                   |
| CDKN1B        |                                   |
| <b>CDKN2A</b> | Familial cutaneous melanoma       |
| CDKN2B        |                                   |
| CDKN2C        |                                   |
| CEBPA         |                                   |
| CENPA         |                                   |
| CHEK1         |                                   |
| <b>CHEK2</b>  | CHEK2-related cancer              |
| CIC           |                                   |
| CREBBP        |                                   |
| CRKL          |                                   |
| CRLF2         |                                   |
| CSDE1         |                                   |
| CSF1R         |                                   |
| CSF3R         |                                   |
| CTCF          |                                   |
| CTLA4         |                                   |
| CTNNB1        |                                   |
| CUL3          |                                   |
| CXCR4         |                                   |
| CYLD          |                                   |
| CYSLTR2       |                                   |
| DAXX          |                                   |
| DCUN1D1       |                                   |
| DDR2          |                                   |
| <b>DICER1</b> | DICER1-related disorders          |

|                |                                   |
|----------------|-----------------------------------|
| DIS3           |                                   |
| DNAJB1         |                                   |
| DNMT1          |                                   |
| DNMT3A         |                                   |
| DNMT3B         |                                   |
| DOT1L          |                                   |
| DROSHA         |                                   |
| DUSP4          |                                   |
| E2F3           |                                   |
| EED            |                                   |
| EGFL7          |                                   |
| <b>EGFR</b>    | Familial lung cancer              |
| EIF1AX         |                                   |
| AGO2           |                                   |
| EIF4A2         |                                   |
| EIF4E          |                                   |
| ELF3           |                                   |
| EP300          |                                   |
| EPAS1          |                                   |
| <b>EPCAM</b>   | Lynch syndrome                    |
| EPHA3          |                                   |
| EPHA5          |                                   |
| EPHA7          |                                   |
| EPHB1          |                                   |
| ERBB2          |                                   |
| ERBB3          |                                   |
| ERBB4          |                                   |
| ERCC2          |                                   |
| ERCC3          |                                   |
| ERCC4          |                                   |
| ERCC5          |                                   |
| ERF            |                                   |
| ERG            |                                   |
| ERRFI1         |                                   |
| ESR1           |                                   |
| ETV1           |                                   |
| ETV6           |                                   |
| EZH1           |                                   |
| EZH2           |                                   |
| <b>FAM175A</b> | Hereditary breast cancer syndrome |
| FAM46C         |                                   |
| FAM58A         |                                   |
| FANCA          |                                   |
| FANCC          |                                   |
| FAT1           |                                   |
| FBXW7          |                                   |
| FGF19          |                                   |
| FGF3           |                                   |
| FGF4           |                                   |
| FGFR1          |                                   |
| FGFR2          |                                   |
| FGFR3          |                                   |
| FGFR4          |                                   |

|              |                                                 |
|--------------|-------------------------------------------------|
| <b>FH</b>    | Hereditary Leiomyomatosis and Renal Cell Cancer |
| <b>FLCN</b>  | Birt-Hogg-Dubé syndrome                         |
| FLT1         |                                                 |
| FLT3         |                                                 |
| FLT4         |                                                 |
| FOXA1        |                                                 |
| FOXL2        |                                                 |
| FOXO1        |                                                 |
| FOXP1        |                                                 |
| FUBP1        |                                                 |
| FYN          |                                                 |
| GATA1        |                                                 |
| <b>GATA2</b> | Familial MDS-AML                                |
| GATA3        |                                                 |
| GLI1         |                                                 |
| GNA11        |                                                 |
| GNAQ         |                                                 |
| GNAS         |                                                 |
| GPS2         |                                                 |
| <b>GREM1</b> | Hereditary mixed polyposis syndrome (HMPS)      |
| GRIN2A       |                                                 |
| GSK3B        |                                                 |
| H3F3A        |                                                 |
| H3F3B        |                                                 |
| H3F3C        |                                                 |
| HGF          |                                                 |
| HIST1H1C     |                                                 |
| HIST1H2BD    |                                                 |
| HIST1H3A     |                                                 |
| HIST1H3B     |                                                 |
| HIST1H3C     |                                                 |
| HIST1H3D     |                                                 |
| HIST1H3E     |                                                 |
| HIST1H3F     |                                                 |
| HIST1H3G     |                                                 |
| HIST1H3H     |                                                 |
| HIST1H3I     |                                                 |
| HIST1H3J     |                                                 |
| HIST2H3C     |                                                 |
| HIST2H3D     |                                                 |
| HIST3H3      |                                                 |
| HLA-A        |                                                 |
| HLA-B        |                                                 |
| HNF1A        |                                                 |
| HOXB13       |                                                 |
| <b>HRAS</b>  | Costello syndrome                               |
| ICOSLG       |                                                 |
| ID3          |                                                 |
| IDH1         |                                                 |
| IDH2         |                                                 |
| IFNGR1       |                                                 |
| IGF1         |                                                 |

|             |                                                               |
|-------------|---------------------------------------------------------------|
| IGF1R       |                                                               |
| IGF2        |                                                               |
| IKBKE       |                                                               |
| IKZF1       |                                                               |
| IL10        |                                                               |
| IL7R        |                                                               |
| INHA        |                                                               |
| INHBA       |                                                               |
| INPP4A      |                                                               |
| INPP4B      |                                                               |
| INPPL1      |                                                               |
| INSR        |                                                               |
| IRF4        |                                                               |
| IRS1        |                                                               |
| IRS2        |                                                               |
| JAK1        |                                                               |
| <b>JAK2</b> | Familial thrombocytosis                                       |
| JAK3        |                                                               |
| JUN         |                                                               |
| KDM5A       |                                                               |
| KDM5C       |                                                               |
| KDM6A       |                                                               |
| KDR         |                                                               |
| KEAP1       |                                                               |
| <b>KIT</b>  | Hereditary Gastrointestinal stromal tumors (GISTs)            |
| KLF4        |                                                               |
| <b>KRAS</b> | Noonan Syndrome                                               |
| LATS1       |                                                               |
| LATS2       |                                                               |
| LMO1        |                                                               |
| LYN         |                                                               |
| MALT1       |                                                               |
| MAP2K1      |                                                               |
| MAP2K2      |                                                               |
| MAP2K4      |                                                               |
| MAP3K13     |                                                               |
| MAP3K14     |                                                               |
| MAP3K1      |                                                               |
| MAPK1       |                                                               |
| MAPK3       |                                                               |
| MAPKAP1     |                                                               |
| <b>MAX</b>  | Hereditary paraganglioma-pheochromocytoma (PGL/PCC) syndromes |
| MCL1        |                                                               |
| MDC1        |                                                               |
| MDM2        |                                                               |
| MDM4        |                                                               |
| MED12       |                                                               |
| MEF2B       |                                                               |
| <b>MEN1</b> | Multiple endocrine neoplasia, type 1                          |
| <b>MET</b>  | Hereditary papillary renal                                    |

|               |                                                                |
|---------------|----------------------------------------------------------------|
|               | carcinoma                                                      |
| MGA           |                                                                |
| <b>MITF</b>   | Familial melanoma and renal cell carcinoma                     |
| <b>MLH1</b>   | Lynch syndrome                                                 |
| MLL2          |                                                                |
| MLL3          |                                                                |
| MLL4          |                                                                |
| MLL           |                                                                |
| MPL           |                                                                |
| <b>MRE11A</b> | Ataxia-telangiectasia-like disorder (recessive); breast cancer |
| <b>MSH2</b>   | Lynch syndrome                                                 |
| MSH3          |                                                                |
| <b>MSH6</b>   | Lynch syndrome                                                 |
| MSI1          |                                                                |
| MSI2          |                                                                |
| MST1          |                                                                |
| MST1R         |                                                                |
| MTOR          |                                                                |
| <b>MUTYH</b>  | MUTYH-associated polyposis (MAP)                               |
| MYC           |                                                                |
| MYCL1         |                                                                |
| MYCN          |                                                                |
| MYD88         |                                                                |
| MYOD1         |                                                                |
| <b>NBN</b>    | Nijmegen breakage syndrome; NBN-related cancer risk            |
| NCOA3         |                                                                |
| NCOR1         |                                                                |
| NEGR1         |                                                                |
| <b>NF1</b>    | Neurofibromatosis, type 1                                      |
| <b>NF2</b>    | Neurofibromatosis, type 2                                      |
| NFE2L2        |                                                                |
| NFKBIA        |                                                                |
| NKX2-1        |                                                                |
| NKX3-1        |                                                                |
| NOTCH1        |                                                                |
| NOTCH2        |                                                                |
| NOTCH3        |                                                                |
| NOTCH4        |                                                                |
| NPM1          |                                                                |
| <b>NRAS</b>   | Autoimmune lymphoproliferative syndrome (ALPS)                 |
| NSD1          |                                                                |
| NTHL1         |                                                                |
| NTRK1         |                                                                |
| NTRK2         |                                                                |
| NTRK3         |                                                                |
| NUF2          |                                                                |
| NUP93         |                                                                |
| PAK1          |                                                                |

|               |                                                                            |
|---------------|----------------------------------------------------------------------------|
| PAK7          |                                                                            |
| <b>PALB2</b>  | PALB2-related cancer; Fanconi anemia                                       |
| PARK2         |                                                                            |
| PARP1         |                                                                            |
| <b>PAX5</b>   | B cell precursor acute lymphoblastic leukemia (B-ALL)                      |
| PBRM1         |                                                                            |
| PDCD1         |                                                                            |
| PDCD1LG2      |                                                                            |
| <b>PDGFRA</b> | Hereditary Gastrointestinal stromal tumors (GISTs)                         |
| PDGFRB        |                                                                            |
| PDPK1         |                                                                            |
| PGR           |                                                                            |
| <b>PHOX2B</b> | Familial neuroblastoma; Congenital central hypoventilation syndrome (CCHS) |
| PIK3C2G       |                                                                            |
| PIK3C3        |                                                                            |
| PIK3CA        |                                                                            |
| PIK3CB        |                                                                            |
| PIK3CD        |                                                                            |
| PIK3CG        |                                                                            |
| PIK3R1        |                                                                            |
| PIK3R2        |                                                                            |
| PIK3R3        |                                                                            |
| PIM1          |                                                                            |
| PLCG2         |                                                                            |
| PLK2          |                                                                            |
| PMAIP1        |                                                                            |
| PMS1          |                                                                            |
| <b>PMS2</b>   | Lynch syndrome                                                             |
| PNRC1         |                                                                            |
| POLD1         |                                                                            |
| <b>POLE</b>   | Colorectal cancer and endometrial cancer                                   |
| PPARG         |                                                                            |
| PPM1D         |                                                                            |
| PPP2R1A       |                                                                            |
| PPP4R2        |                                                                            |
| PPP6C         |                                                                            |
| PRDM14        |                                                                            |
| PRDM1         |                                                                            |
| PREX2         |                                                                            |
| PRKAR1A       |                                                                            |
| PRKCI         |                                                                            |
| PRKD1         |                                                                            |
| <b>PTCH1</b>  | Nevoid basal cell carcinoma syndrome (NBCCS)                               |
| <b>PTEN</b>   | PTEN hamartoma tumor syndrome                                              |
| PTP4A1        |                                                                            |

|               |                                                                               |
|---------------|-------------------------------------------------------------------------------|
| PTPN11        |                                                                               |
| PTPRD         |                                                                               |
| PTPRS         |                                                                               |
| PTPRT         |                                                                               |
| RAB35         |                                                                               |
| RAC1          |                                                                               |
| RAC2          |                                                                               |
| RAD21         |                                                                               |
| <b>RAD50</b>  | Nijmegen breakage syndrome-like disorder                                      |
| <b>RAD51</b>  | Hereditary breast cancer                                                      |
| <b>RAD51B</b> | Hereditary breast cancer                                                      |
| <b>RAD51C</b> | RAD51C-related cancer; Fanconi anemia                                         |
| <b>RAD51D</b> | Hereditary ovarian cancer                                                     |
| RAD52         |                                                                               |
| RAD54L        |                                                                               |
| RAF1          |                                                                               |
| RARA          |                                                                               |
| RASA1         |                                                                               |
| <b>RB1</b>    | Retinoblastoma                                                                |
| RBM10         |                                                                               |
| <b>RECQL4</b> | Rothmund-Thomson syndrome (RTS)                                               |
| RECQL         |                                                                               |
| REL           |                                                                               |
| <b>RET</b>    | Multiple endocrine neoplasia, type 2                                          |
| RFWD2         |                                                                               |
| RHEB          |                                                                               |
| RHOA          |                                                                               |
| RICTOR        |                                                                               |
| RIT1          |                                                                               |
| RNF43         |                                                                               |
| ROS1          |                                                                               |
| RPS6KA4       |                                                                               |
| RPS6KB2       |                                                                               |
| RPTOR         |                                                                               |
| RRAGC         |                                                                               |
| RRAS2         |                                                                               |
| RRAS          |                                                                               |
| RTEL1         |                                                                               |
| <b>RUNX1</b>  | Familial platelet disorder with predisposition to acute myelogenous leukaemia |
| RXRA          |                                                                               |
| RYBP          |                                                                               |
| <b>SDHA</b>   | Hereditary paraganglioma-pheochromocytoma (PGL/PCC) syndromes                 |
| <b>SDHAF2</b> | Hereditary paraganglioma-pheochromocytoma (PGL/PCC) syndromes                 |
| <b>SDHB</b>   | Hereditary paraganglioma-                                                     |

|                |                                                               |
|----------------|---------------------------------------------------------------|
|                | pheochromocytoma (PGL/PCC) syndromes                          |
| <b>SDHC</b>    | Hereditary paraganglioma-pheochromocytoma (PGL/PCC) syndromes |
| <b>SDHD</b>    | Hereditary paraganglioma-pheochromocytoma (PGL/PCC) syndromes |
| SESN1          |                                                               |
| SESN2          |                                                               |
| SESN3          |                                                               |
| SETD2          |                                                               |
| SETD8          |                                                               |
| SF3B1          |                                                               |
| SH2B3          |                                                               |
| SH2D1A         |                                                               |
| SHOC2          |                                                               |
| SHQ1           |                                                               |
| SLX4           |                                                               |
| SMAD2          |                                                               |
| <b>SMAD3</b>   | Thoracic aortic aneurysms and aortic dissections (TAAD)       |
| <b>SMAD4</b>   | Juvenile polyposis syndrome                                   |
| <b>SMARCA4</b> | Rhabdoid tumor predisposition syndrome type 2                 |
| <b>SMARCB1</b> | Rhabdoid tumor predisposition syndrome type 1                 |
| SMARCD1        |                                                               |
| SMO            |                                                               |
| SMYD3          |                                                               |
| SOCS1          |                                                               |
| SOS1           |                                                               |
| SOX17          |                                                               |
| SOX2           |                                                               |
| SOX9           |                                                               |
| SPEN           |                                                               |
| SPOP           |                                                               |
| SPRED1         |                                                               |
| SRC            |                                                               |
| SRSF2          |                                                               |
| STAG2          |                                                               |
| STAT3          |                                                               |
| STAT5A         |                                                               |
| STAT5B         |                                                               |
| <b>STK11</b>   | Peutz-Jeghers syndrome                                        |
| STK19          |                                                               |
| STK40          |                                                               |
| <b>SUFU</b>    | Medulloblastoma                                               |
| SUZ12          |                                                               |
| SYK            |                                                               |
| TAP1           |                                                               |
| TAP2           |                                                               |
| TBX3           |                                                               |
| TCEB1          |                                                               |

|                                                   |                                                                                                                                            |
|---------------------------------------------------|--------------------------------------------------------------------------------------------------------------------------------------------|
| TCF3                                              |                                                                                                                                            |
| TCF7L2                                            |                                                                                                                                            |
| TEK                                               |                                                                                                                                            |
| <b>TERT</b>                                       | Familial pulmonary fibrosis (FPF); Dyskeratosis congenita (DC)                                                                             |
| TET1                                              |                                                                                                                                            |
| TET2                                              |                                                                                                                                            |
| <b>TGFBR1</b>                                     | Thoracic aortic aneurysms and aortic dissections (TAAD)                                                                                    |
| <b>TGFBR2</b>                                     | Thoracic aortic aneurysms and aortic dissections (TAAD)                                                                                    |
| <b>TMEM127</b>                                    | Familial pheochromocytoma syndrome                                                                                                         |
| TMPRSS2                                           |                                                                                                                                            |
| TNFAIP3                                           |                                                                                                                                            |
| TNFRSF14                                          |                                                                                                                                            |
| TOP1                                              |                                                                                                                                            |
| <b>TP53</b>                                       | Li-Fraumeni syndrome                                                                                                                       |
| TP53BP1                                           |                                                                                                                                            |
| TP63                                              |                                                                                                                                            |
| TRAF2                                             |                                                                                                                                            |
| TRAF7                                             |                                                                                                                                            |
| <b>TSC1</b>                                       | Tuberous sclerosis complex (TSC)                                                                                                           |
| <b>TSC2</b>                                       | Tuberous sclerosis complex (TSC)                                                                                                           |
| TSHR                                              |                                                                                                                                            |
| U2AF1                                             |                                                                                                                                            |
| UPF1                                              |                                                                                                                                            |
| VEGFA                                             |                                                                                                                                            |
| <b>VHL</b>                                        | Von Hippel-Lindau syndrome; Familial erythrocytosis, type 2                                                                                |
| VTCN1                                             |                                                                                                                                            |
| WHSC1                                             |                                                                                                                                            |
| WHSC1L1                                           |                                                                                                                                            |
| <b>WT1</b>                                        | WAGR (Wilms tumor-aniridia-genital anomalies-retardation) syndrome, Denys-Drash syndrome (DDS), Frasier syndrome, and isolated Wilms tumor |
| WWTR1                                             |                                                                                                                                            |
| XIAP                                              |                                                                                                                                            |
| XPO1                                              |                                                                                                                                            |
| XRCC2                                             |                                                                                                                                            |
| YAP1                                              |                                                                                                                                            |
| YES1                                              |                                                                                                                                            |
| ZFHX3                                             |                                                                                                                                            |
| ZRSR2                                             |                                                                                                                                            |
| Genes in bold were included for germline analysis |                                                                                                                                            |

**eTable 2. Current Indications for Genetic Counseling Referral for Patients with Renal Cell Carcinoma**

|                                                                                                                                                   |
|---------------------------------------------------------------------------------------------------------------------------------------------------|
| 1. Clear cell RCC with any of the following criteria: age of diagnosis <50, bilateral or multifocal tumors, ≥1 close relative with clear cell RCC |
| 2. RCC with papillary type 1 histology                                                                                                            |
| 3. RCC with papillary type 2 histology                                                                                                            |
| 4. RCC with collecting duct histology                                                                                                             |
| 5. RCC with tubulopapillary histology                                                                                                             |
| 6. RCC with Birt-Hogg-Dubé related histology (chromophobe, oncocytoma, oncocytic hybrid)                                                          |
| 7. RCC with 2 additional features of Cowden syndrome                                                                                              |
| 8. Angiomyolipomas of the kidney and one additional feature of tuberous sclerosis complex                                                         |

**Abbreviations:** RCC, renal cell carcinoma

**eTable 3: Reasons for Declining Germline Genetic Testing**

| <b>Reasons for declining germline genetic testing</b> | <b>Number of patients</b> |
|-------------------------------------------------------|---------------------------|
| Potential cause of worry or anxiety                   | 5                         |
| Lack of interest                                      | 3                         |
| Not wanting to know the information                   | 2                         |
| Unsure                                                | 2                         |
| Concerned about insurance coverage                    | 1                         |



**eTable 4. Demographic Characteristics**

|                                                  | <b>No.</b>     | <b>%</b> |
|--------------------------------------------------|----------------|----------|
| Total                                            | 254            |          |
| Age at diagnosis                                 |                |          |
| Median                                           | 56             |          |
| Range                                            | 13 to 79 years |          |
| Age 46 or younger                                | 49             | 19       |
| Age 47 or older                                  | 205            | 81       |
| Sex                                              |                |          |
| Female                                           | 75             | 30       |
| Male                                             | 179            | 70       |
| Race or ethnic background                        |                |          |
| Non-Hispanic white                               | 211            | 83       |
| Hispanic                                         | 6              | 2        |
| Non-Hispanic African American                    | 19             | 8        |
| Asian or Pacific Islander                        | 12             | 5        |
| Other or unknown                                 | 6              | 2        |
| Ashkenazi Jewish ethnicity                       |                |          |
| Yes                                              | 31             | 12       |
| No                                               | 199            | 78       |
| Unknown                                          | 24             | 10       |
| Family History of RCC                            |                |          |
| First-degree relative                            | 19             | 8        |
| First, second or third-degree relative           | 24             | 10       |
| More than 1 relative                             | 7              | 3        |
| Tumor histologic subtype <sup>a</sup>            |                |          |
| Clear Cell                                       | 177            | 69       |
| Unclassified                                     | 29             | 11       |
| Unclassified, HLRCC features                     | 7              | 3        |
| Unclassified, SDHB-deficient                     | 1              | <1       |
| Papillary                                        | 14             | 5        |
| Chromophobe                                      | 11             | 4        |
| Translocation-associated                         | 10             | 4        |
| Other                                            | 12             | 5        |
| Patient history of prior malignancy <sup>b</sup> |                |          |
| Yes                                              | 33             | 13       |
| No                                               | 221            | 87       |
| Bilateral or multifocal RCC at diagnosis         |                |          |
| Yes                                              | 14             | 6        |
| No                                               | 240            | 94       |
| Nephrectomy                                      |                |          |
| Yes                                              | 240            | 94       |

|                           |     |    |
|---------------------------|-----|----|
| No                        | 14  | 6  |
| Stage at diagnosis        |     |    |
| Stage I                   | 25  | 10 |
| Stage II                  | 22  | 9  |
| Stage III                 | 103 | 41 |
| Stage IV                  | 102 | 40 |
| Stage at time of analysis |     |    |
| Stage I                   | 0   | 0  |
| Stage II                  | 0   | 0  |
| Stage III                 | 28  | 11 |
| Stage IV                  | 226 | 89 |

Abbreviations: RCC, renal cell carcinoma; HLRCC, hereditary leiomyomatosis and renal cell carcinoma.

aThree patients had both a clear cell and a non-clear cell tumor.

bExcludes nonmelanoma skin cancers

**eTable 5. Detail on Pathogenic Mutations**

| Study ID | GENE 1 | VARIANT 1               | PROTEIN 1        | TRANSCRIPT NM_#S | PENETRANCE | Zygoty                     | Pathogenicity |
|----------|--------|-------------------------|------------------|------------------|------------|----------------------------|---------------|
| RCC4     | CHEK2  | deletion exons 9-10     |                  | NM_007194        | MODERATE   | WT                         | P             |
| RCC15    | APC    | c.3920T>A               | p.Ile1307Lys     | NM_000038        | LOW        | LOH                        | P             |
| RCC20    | FH     | deletion exon 1         |                  | NM_000143        | HIGH       | PATH<br>LOS                | P             |
| RCC26    | VHL    | c.154G>T                | p.Glu52*         | NM_000551        | HIGH       | LOH                        | P             |
| RCC29    | CHEK2  | c.216T>G                | p.Tyr72*         | NM_007194        | MODERATE   | WT                         | P             |
| RCC31    | CHEK2  | c.1100delC              | p.Thr367Metfs*15 | NM_007194        | MODERATE   | LOH                        | P             |
| RCC34    | CHEK2  | c.1283C>T               | p.Ser428Phe      | NM_007194        | MODERATE   | LOH                        | P             |
| RCC35    | APC    | c.3920T>A               | p.Ile1307Lys     | NM_000038        | LOW        | WT                         | P             |
| RCC36    | CHEK2  | c.1283C>T               | p.Ser428Phe      | NM_007194        | MODERATE   | LOH                        | P             |
| RCC46    | MUTYH  | c.1187G>A               | p.Gly396Asp      | NM_001128425     | LOW        | WT                         | P             |
| RCC47    | SDHA   | c.91C>T                 | p.Arg31*         | NM_004168        | HIGH       | CN-LOH                     | LP            |
| RCC65    | CHEK2  | c.1100delC              | p.Thr367Metfs*15 | NM_007194        | MODERATE   | LOH                        | P             |
| RCC94    | MUTYH  | c.207delC               | p.Arg70Glyfs*21  | NM_001128425     | LOW        | LOH                        | P             |
| RCC98    | PALB2  | c.3234T>A               | p.Cys1078*       | NM_024675        | HIGH       | WT                         | P             |
| RCC102   | MUTYH  | c.1187G>A               | p.Gly396Asp      | NM_001128425     | LOW        | WT                         | P             |
| RCC120   | BARD1  | c.1111A>T               | p.Lys371*        | NM_000465        | UNCERTAIN  | WT                         | P             |
| RCC131   | CHEK2  | c.470T>C                | p.Ile157Thr      | NM_007194        | UNCERTAIN  | WT                         | P             |
| RCC139   | FH     | deletion exon 1         |                  | NM_000143        | HIGH       | LOH                        | LP            |
| RCC142   | BAP1   | deletion exons 15-17    |                  | NM_004656        | HIGH       | LOH                        | P             |
| RCC151   | CHEK2  | deletion exons 9-10     |                  | NM_007194        | MODERATE   | WT                         | P             |
| RCC155   | BAP1   | c.1983+1_1983+3delinsAT |                  | NM_004656        | HIGH       | LOH                        | LP            |
| RCC159   | FH     | c.584T>C                | p.Met195Thr      | NM_000143        | HIGH       | 2nd<br>somatic<br>mutation | LP            |
| RCC161   | MSH6   | c.2731C>T               | p.Arg911*        | NM_000179        | HIGH       | WT                         | P             |

|        |        |                          |                    |              |           |             |    |
|--------|--------|--------------------------|--------------------|--------------|-----------|-------------|----|
| RCC165 | RECQL4 | c.1391-2A>G              |                    | NM_004260    | RECESSIVE | WT          | LP |
| RCC169 | EPCAM  | c.556-14A>G              | p.Tyr186Phefs*6    | NM_002354    | RECESSIVE | WT          | P  |
| RCC173 | MUTYH  | c.1187G>A                | p.Gly396Asp        | NM_001128425 | LOW       | LOH         | P  |
| RCC176 | APC    | c.3920T>A                | p.Ile1307Lys       | NM_000038    | LOW       | WT          | P  |
| RCC185 | CHEK2  | c.470T>C                 | p.Ile157Thr        | NM_007194    | UNCERTAIN | WT          | P  |
| RCC186 | MET    | c.3239T>C                | p.Phe1080Ser       | NM_000245    | HIGH      | WT          | LP |
| RCC187 | BAP1   | c.437G>A                 | p.Arg146Lys        | NM_004656    | HIGH      | LOS         | LP |
| RCC199 | RECQL4 | c.2662C>T                | p.Gln888*          | NM_004260    | RECESSIVE | WT          | P  |
| RCC203 | APC    | c.3920T>A                | p.Ile1307Lys       | NM_000038    | LOW       | WT          | P  |
| RCC206 | FH     | c.556-2A>T               |                    | NM_000143    | HIGH      | PATH<br>LOS | LP |
| RCC207 | BRCA2  | c.5946delT               | p.Ser1982Argfs*22  | NM_000059    | HIGH      | WT          | P  |
| RCC211 | FH     | c.1083_1086delTGAA       | p.Glu362Glnfs*10   | NM_000143    | HIGH      | PATH<br>LOS | P  |
| RCC212 | SDHB   | c.587G>A                 | p.Cys196Tyr        | NM_003000    | HIGH      | LOH         | LP |
| RCC222 | APC    | c.3920T>A                | p.Ile1307Lys       | NM_000038    | LOW       | WT          | P  |
| RCC228 | ATM    | c.-30-2A>G               |                    | NM_000051    | MODERATE  | WT          | LP |
| RCC230 | FH     | c.824_835delGAGGCACTGCTG | p.Gly275_Ala278del | NM_000143    | HIGH      | PATH<br>LOS | LP |
| RCC240 | FH     | deletion of exons 7-10   |                    | NM_000143    | HIGH      | PATH<br>LOS | P  |
| RCC244 | RAD51C | c.1026+5_1026+7delGTA    |                    | NM_058216    | MODERATE  | WT          | LP |

Abbreviations: LOH, loss of heterozygosity; CN-LOH, copy neutral- loss of heterozygosity; WT, wild-type; ND, could not be determined; PATH LOS, loss of staining on pathology; P, pathogenic; LP, likely pathogenic

**eTable 6. CHEK2 Variants and Association with Renal Cell Carcinoma**

| Variant (Protein change)                               | Allele Carriers in Cohort | Non-Allele Carriers in Cohort | Allele Carriers in ExAC | Non-Allele Carriers in ExAC | Odds Ratio (CI) | P Value |
|--------------------------------------------------------|---------------------------|-------------------------------|-------------------------|-----------------------------|-----------------|---------|
| c.1283C>T (p.Ser428Phe)                                | 2                         | 506                           | 29                      | 106208                      |                 |         |
| c.470T>C (p.Ile157Thr)                                 | 2                         | 506                           | 411                     | 106206                      |                 |         |
| c.1100delC (p.Thr367Metfs*15)                          | 2                         | 506                           | 189                     | 106160                      |                 |         |
| c216T>G exon 2 (p.Tyr72*)                              | 1                         | 506                           | Absent                  | na                          |                 |         |
| Intragenic deletion of the exons 9-10                  | 2                         | 506                           | Absent                  | na                          |                 |         |
| CHEK2 burden test                                      | 9                         | 499                           | 629                     | 106208                      | 3.0 (1.3-5.8)   | 0.003** |
|                                                        |                           |                               |                         |                             |                 |         |
| CHEK2 burden test without (p.Ile157Thr)                | 7                         | 497                           | 600                     | 106183                      | 2.4 (0.99-5.2)  | 0.025** |
|                                                        |                           |                               |                         |                             |                 |         |
| Burden test without the founder <sup>a</sup> mutations | 5                         | 503                           | 411                     | 106208                      | 2.5 (0.8-6)     | 0.04    |

<sup>a</sup>Founder mutations:

c.1100delC (p.Thr367Metfs\*15)

c.1283C>T (p.Ser428Phe)

**eTable 7. Associations between Clinicopathologic Characteristics and Presence of RCC-Associated Germline Mutation**

|                                      | Germline Mutation in RCC-Associated Gene | No RCC-Associated Germline Mutation | P-Value* |
|--------------------------------------|------------------------------------------|-------------------------------------|----------|
| Age at Diagnosis                     |                                          |                                     |          |
| ≤46years                             | 5 (36%)                                  | 44 (18%)                            | 0.15     |
| >46 years                            | 9 (64%)                                  | 196 (82%)                           |          |
| Subtype                              |                                          |                                     |          |
| Clear Cell                           | 3 (22%)                                  | 174 (72.5%)                         | <0.001   |
| Non-Clear Cell                       | 9 (64%)                                  | 65 (27%)                            |          |
| Both                                 | 2 (14%)                                  | 1 (0.5%)                            |          |
| Family History RCC FDR               |                                          |                                     |          |
| Yes                                  | 1 (7%)                                   | 18 (8%)                             | 1        |
| No                                   | 13 (93%)                                 | 222 (92%)                           |          |
| Metastatic Disease                   |                                          |                                     |          |
| Yes                                  | 13 (93%)                                 | 212 (88%)                           | 1        |
| No                                   | 1 (7%)                                   | 28 (12%)                            |          |
| Multiple Malignancy (other than RCC) |                                          |                                     |          |
| Yes                                  | 2 (14%)                                  | 39 (16%)                            | 1        |
| No                                   | 12 (86%)                                 | 201 (84%)                           |          |
| Bilateral or Multifocal RCC          |                                          |                                     |          |
| Yes                                  | 4 (29%)                                  | 10 (4%)                             | 0.004    |
| No                                   | 10 (71%)                                 | 230 (96%)                           |          |

\*RCC-associated germline mutations include mutations in *BAP1*, *FH*, *MET*, *SDHA*, *SDHB*, and *VHL*

**eTable 8. OncoKB Levels of Evidence and Somatic Biomarkers in Cohort**

| Study ID | Somatic Gene Altered | OncoKB Level of Evidence <sup>a</sup> |
|----------|----------------------|---------------------------------------|
| RCC221   | TSC2                 | Level 2B                              |
| RCC186   | BRCA1                | Level 2B                              |
| RCC11    | TSC1                 | Level 2B                              |
| RCC126   | ALK (fusion)         | Level 2B                              |
| RCC219   | TSC2                 | Level 2B                              |
| RCC176   | BRCA2                | Level 2B                              |
| RCC63    | TSC2                 | Level 2B                              |
| RCC69    | TSC2                 | Level 2B                              |
| RCC239   | TSC1                 | Level 2B                              |
| RCC142   | TSC2                 | Level 2B                              |
| RCC223   | TSC1                 | Level 2B                              |
| RCC41    | TSC1                 | Level 2B                              |
| RCC95    | TSC1                 | Level 2B                              |
| RCC10    | TSC2                 | Level 2B                              |
| RCC211   | TSC1                 | Level 2B                              |
| RCC228   | MET                  | Level 3                               |
| RCC98    | ERBB2                | Level 3                               |
| RCC229   | PIK3CA               | Level 3                               |
| RCC102   | ERBB2                | Level 3                               |
| RCC48    | PIK3CA               | Level 3                               |
| RCC161   | PIK3CA               | Level 3                               |
| RCC147   | PIK3CA               | Level 3                               |
| RCC5     | AKT1                 | Level 3                               |
| RCC20    | PIK3CA               | Level 3                               |
| RCC120   | PIK3CA               | Level 3                               |
| RCC124   | AKT1                 | Level 3                               |
| RCC214   | PIK3CA               | Level 3                               |
| RCC173   | ERBB2                | Level 3                               |
| RCC106   | MAP2K1               | Level 3                               |
| RCC12    | PIK3CA               | Level 3                               |
| RCC151   | PIK3CA               | Level 3                               |
| RCC104   | PIK3CA               | Level 3                               |
| RCC133   | PIK3CA               | Level 3                               |
| RCC33    | PIK3CA               | Level 3                               |
| RCC254   | PIK3CA               | Level 3                               |
| RCC171   | ERBB2                | Level 3                               |

<sup>a</sup>**Level 2B:** Standard of care biomarker predictive of response to and FDA-approved drug in another indication, but not a standard of care for this indication

**Level 3:** Compelling clinical evidence supports the biomarker as being predictive of response to a drug in this or another indication, but neither biomarker nor drug are standard of care

**eFigure 1 A-C. Families of *BAP1* Germline Mutant Patients and Tumor Immunohistochemistry**

**eFigure 1A: 62F with clear cell RCC**

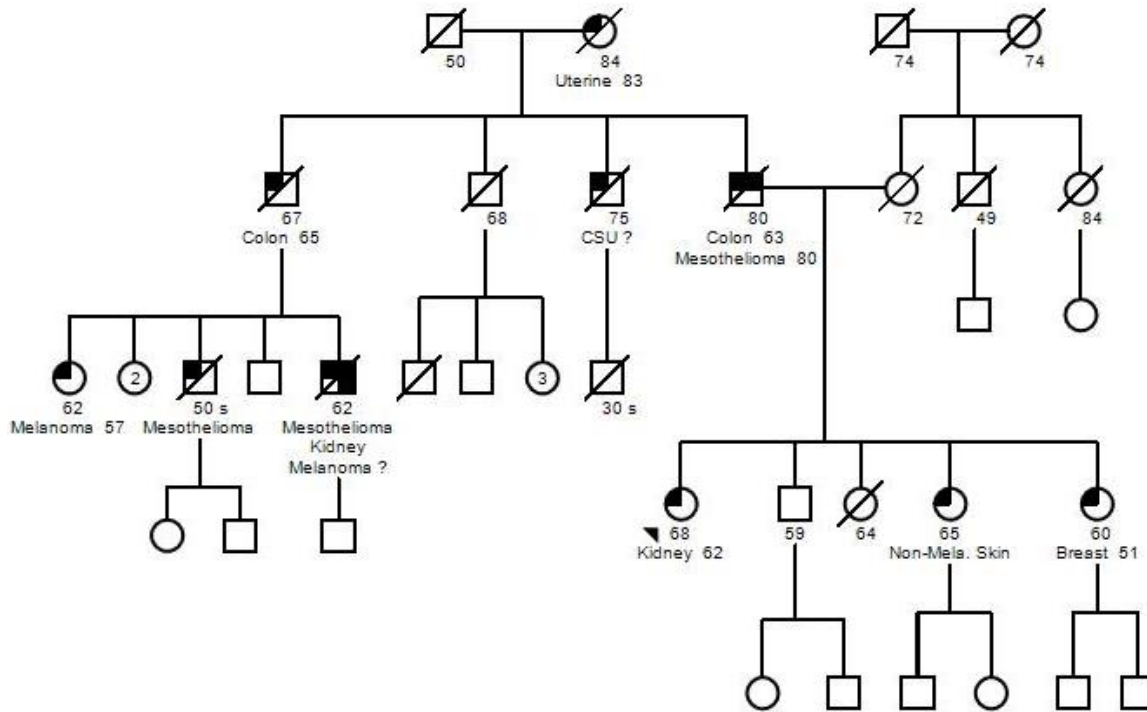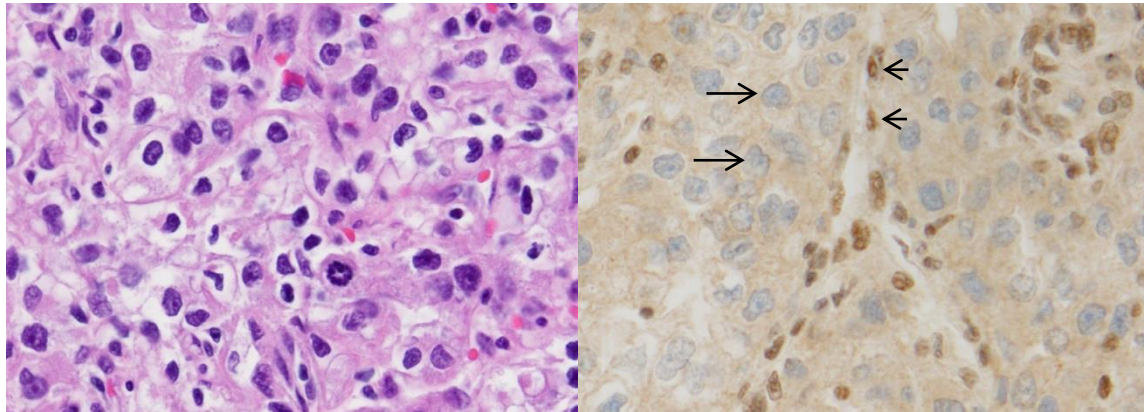

Top panel: Pedigree showing proband with an arrow. Ages, gender and family composition of unaffected relatives may have been altered to preserve anonymity.

Left bottom panel: H&E staining showing clear cell RCC arranged in alveolar architecture and intervening fine fibrovasculature. Right bottom panel: corresponding BAP1 staining demonstrating absent BAP1 nuclear staining in the neoplastic cells (long arrows). Endothelial cell within the "alveolar" fibrovasculatures show retained BAP1 nuclear expression (short arrows). Stromal and lymphocytic cells also show retain nuclear BAP1 expression.



## eFigure 1B

### eFigure 1B: 83M with clear cell RCC and papillary RCC

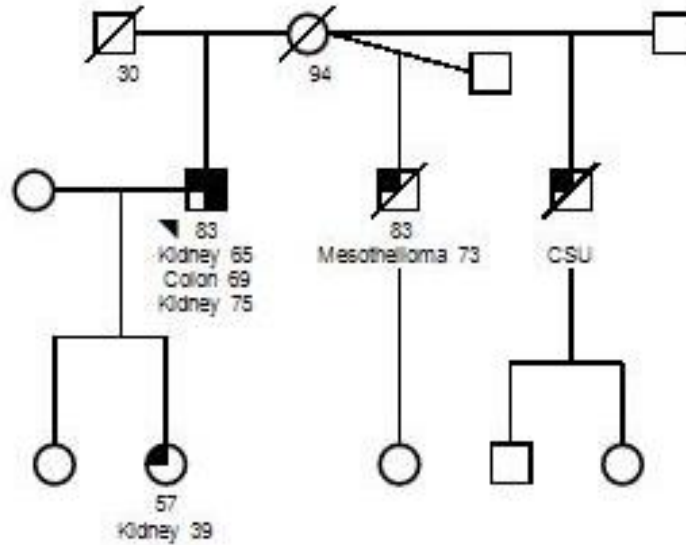

Clear  
cell  
RCC

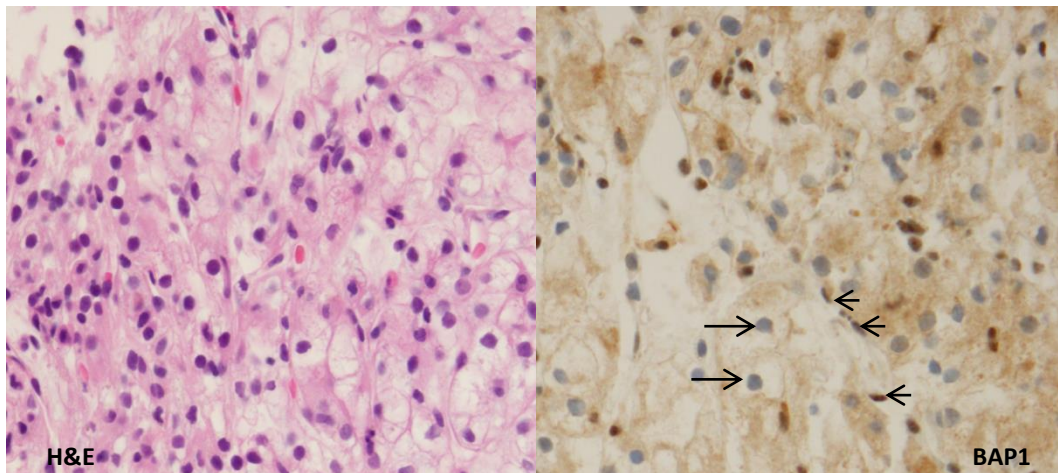

Top panel: Pedigree showing proband with an arrow. Ages, gender and family composition of unaffected relatives may have been altered to preserve anonymity. Abbreviations: CSU, cancer-site unspecified

Left bottom panel: H&E staining showing clear cell RCC histologic features. Right bottom panel: corresponding BAP1 staining demonstrating absent BAP1 nuclear staining in the neoplastic cells (long arrows). Endothelial cell within the "alveolar" fibrovasculatures show retained BAP1 nuclear expression (short arrows). Stromal and lymphocytic cells also show retained nuclear BAP1 expression.

**eFigure 1C**

**eFigure 1C: 52M with clear cell RCC and chromophobe RCC**

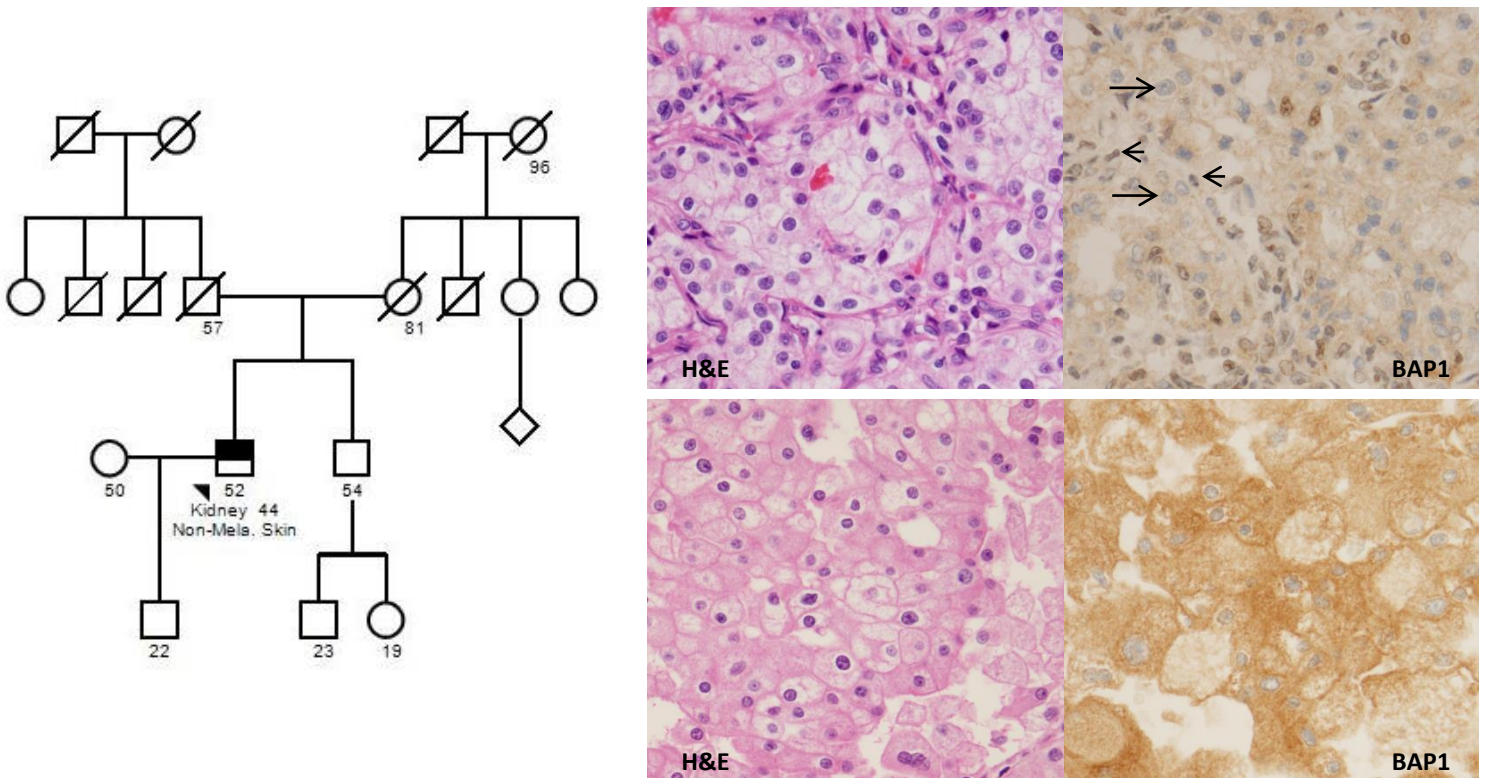

Left panel: Pedigree showing proband with an arrow. Ages, gender and family composition of unaffected relatives may have been altered to preserve anonymity.

Right panels. Single nephrectomy specimen harboring spatially separated clear cell (right upper panels) and chromophobe (right lower panels) RCCs. Left panels: H&E staining showing respective histologic features with fine “alveolar” fibrovasculatures in the clear cell RCC and perinuclear halos and focal “raisinoid” nuclei in the chromophobe RCC. Right panels: corresponding BAP1 staining demonstrating absent BAP1 nuclear staining in the neoplastic cells (long arrows). Endothelial cell within the “alveolar” fibrovasculatures in the clear cell RCC show retained BAP1 nuclear expression (short arrows). Stromal and lymphocytic cells also show retain nuclear BAP1 expression.
